# Supplementary material for: Pistacia vera Extract Potentiates the Effect of Melatonin on Human Melatonin MT1 and MT2 Receptors with Functional Selectivity
Source: MDPI journal article supplement (doi:10.3390/pharmaceutics15071845), 2023-06-28
Supplement: s1 [file s1]

Supplementary Figure 1

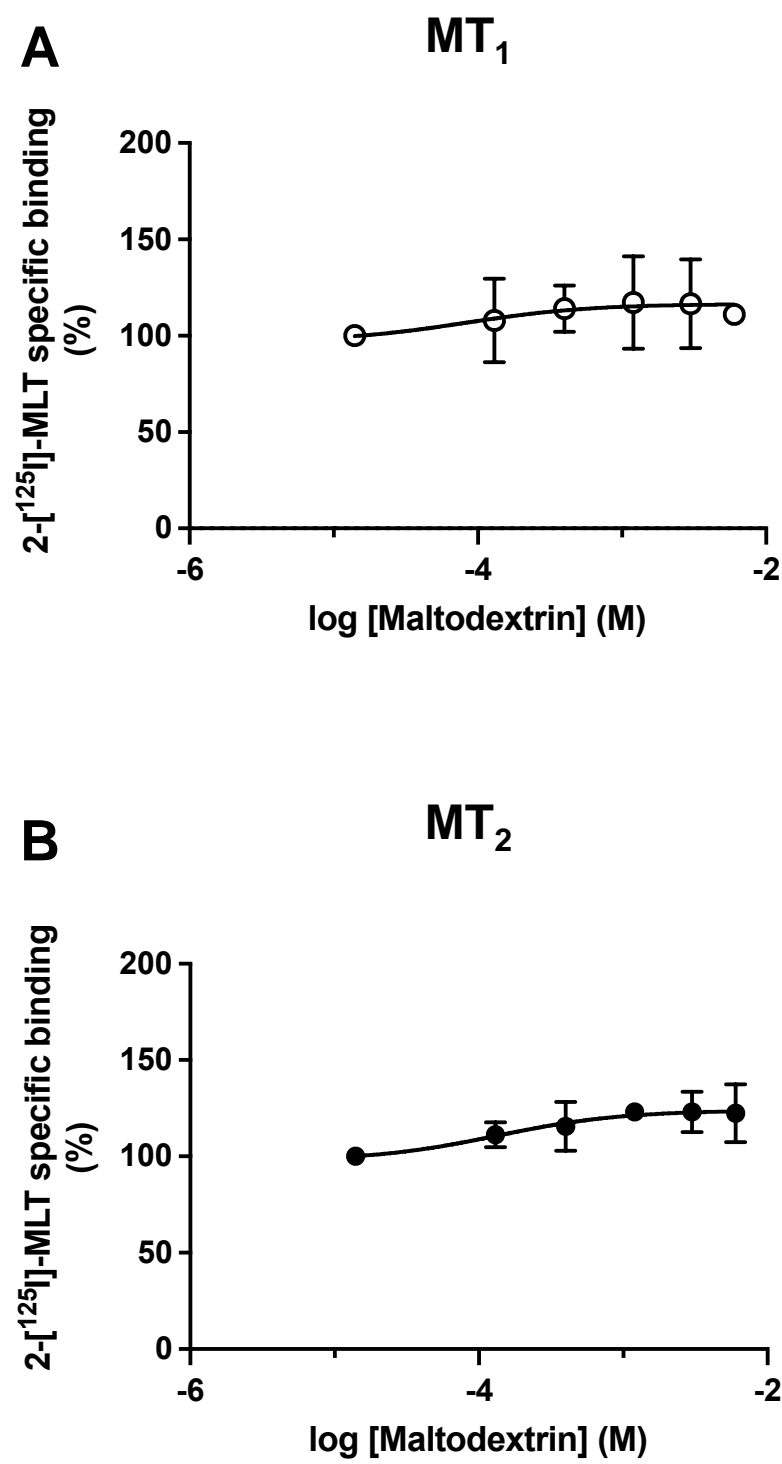

**Supp Figure 1: Effect of maltodextrin on MT<sub>1</sub> (A) and MT<sub>2</sub> (B) receptors.** Crude membrane preparations were incubated with increasing concentrations of maltodextrin and 100 pM of 2-[<sup>125</sup>I]-MLT. Data are expressed as mean ± SEM, n = 2.

Supplementary Figure 2

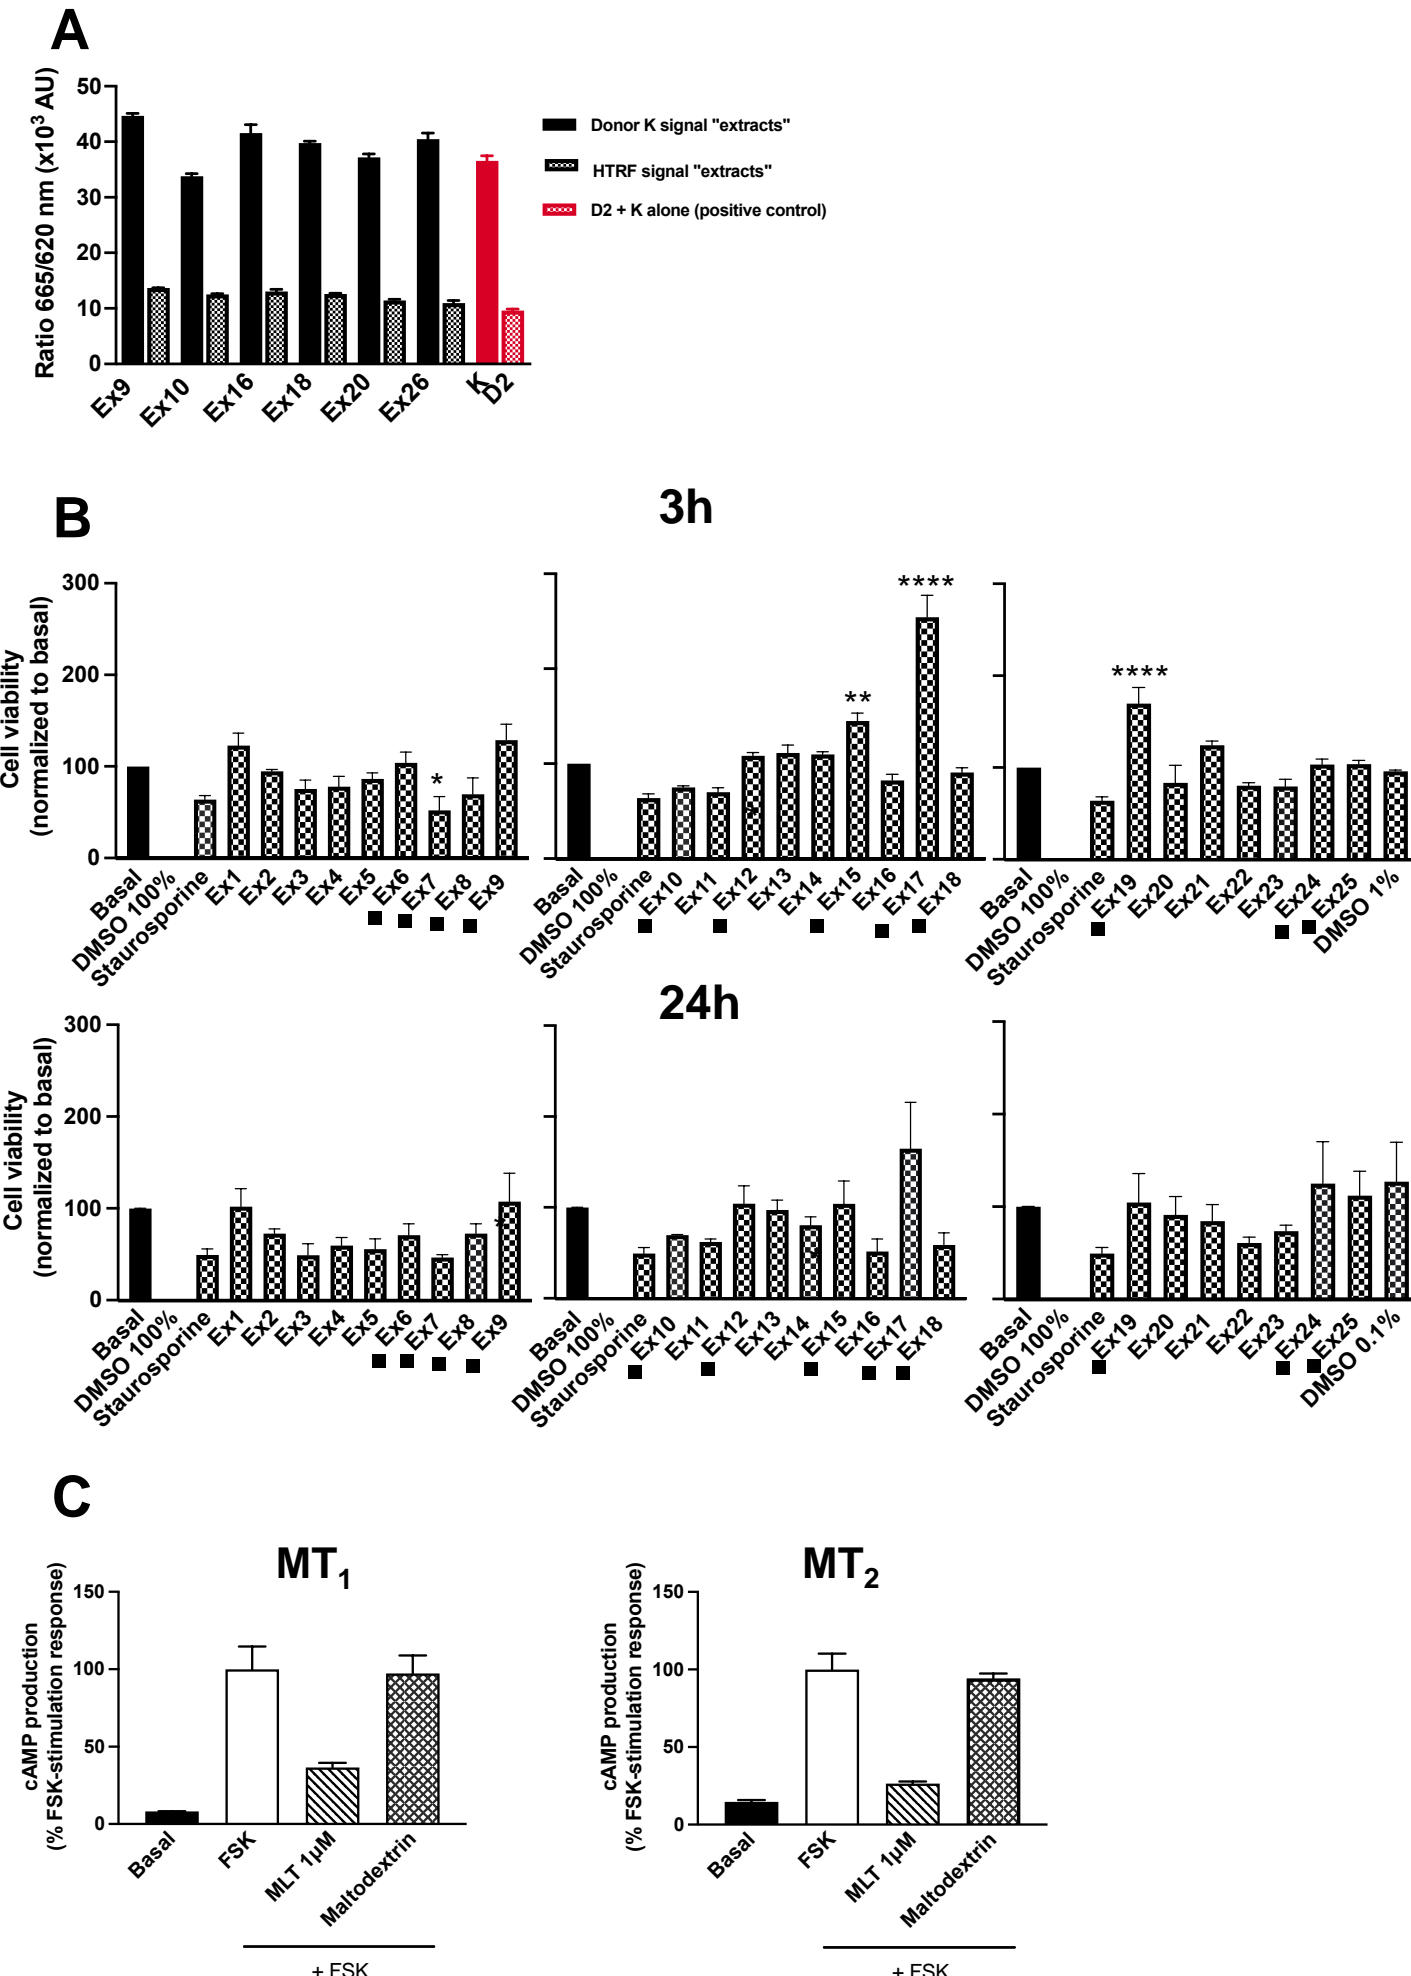

**Supp. Figure 2. Experimental controls of extracts.** The interference of extract colour (**A**), cell viability (**B**) and the maltodextrin additive (**C**) were evaluated in cAMP and MTT assays. All extracts and maltodextrin were tested at 0.16 mg/ml. **Ex18** was used at 0.005 mg/ml. Data are expressed as mean  $\pm$  SEM of one experiment performed in triplicates (A,C) or 3 independent experiments performed in duplicates (B). (\*p < 0.05; \*\*p < 0.01; \*\*\*\*p < 0.0001; One-way ANOVA). Extracts selected for functional studies are labelled with a black square.

# Supplementary Figure 3

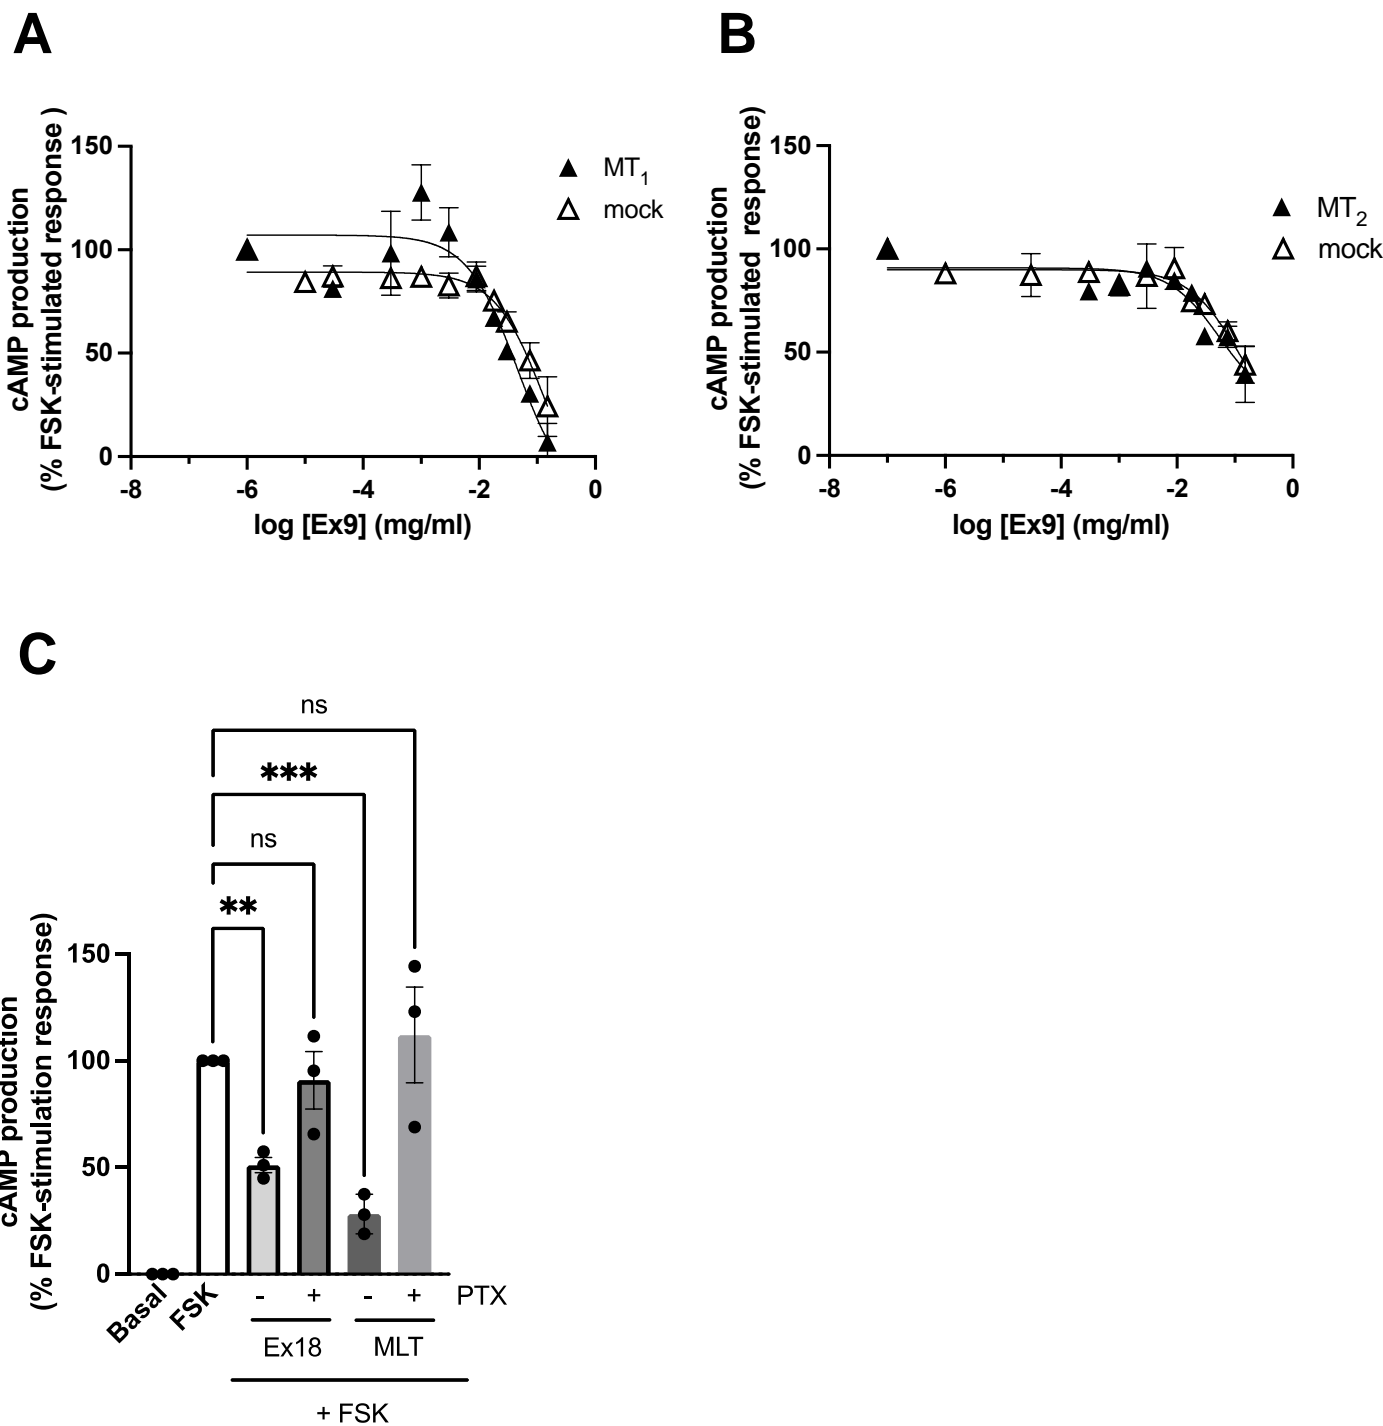

**Supp. Figure 3: Effect of selected plant extracts on forskolin-stimulated cAMP production.** Effect of increasing concentrations of **Ex9** on HEK293 empty vector transfected cells (mock) vs. HEK293 cells expressing MT<sub>1</sub> (**A**) or MT<sub>2</sub> (**B**) receptors. Data are expressed as mean  $\pm$  SEM, n = 3. All experiments were performed in triplicates. (**C**) **G<sub>i</sub> protein-dependent effect of *Pistacia vera*** in HEK cells expressing MT<sub>1</sub> receptors. Cells were pre-treated or not overnight with *Pertussis toxin* (PTX) (10 ng/ml) and stimulated with **MLT** or **Ex18**. Data are normalized to maximal effect of forskolin-stimulated response and are presented as mean  $\pm$  S.E.M. of 3 experiments performed in triplicates. One way ANOVA (\*\*p < 0.01, \*\*\*p < 0.001, ns, not significant).

# Supplementary Figure 4

MT<sub>1</sub>

A

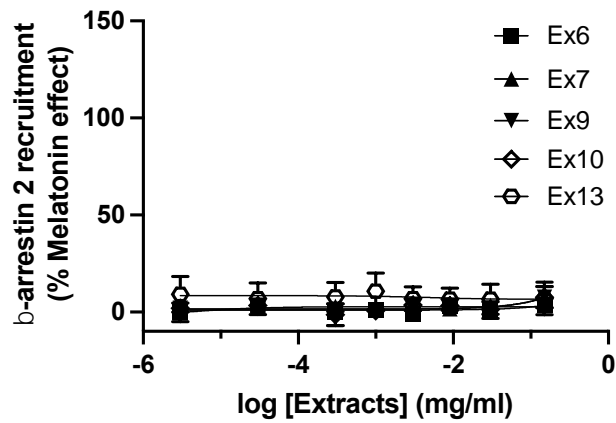

B

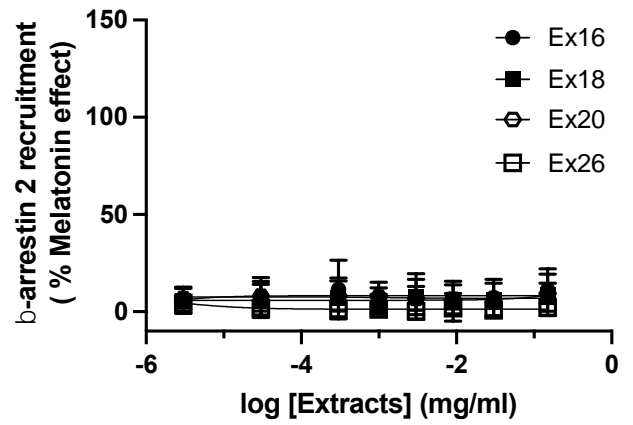

C

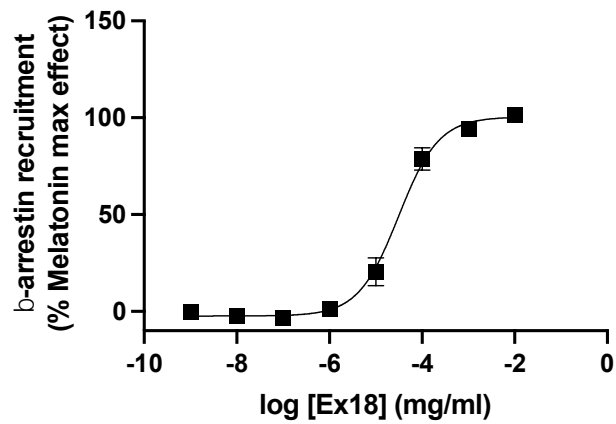

D

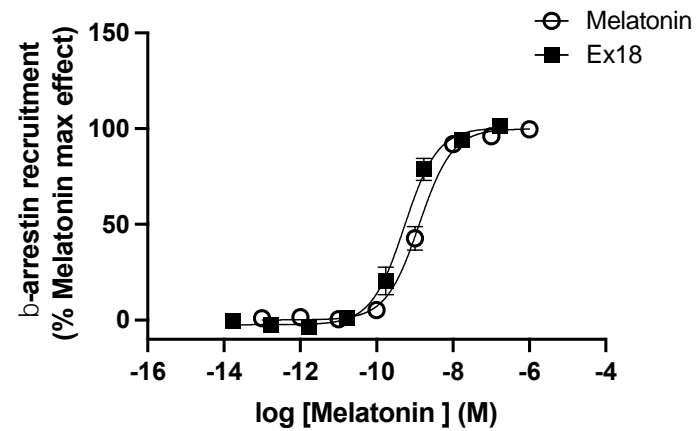

**Supp. Figure 4. Effect of selected plant extracts on  $\beta$ -arrestin2 recruitment.** Concentration-response curves of selected plant extracts (**A, B**) and **Ex18** (**C, D**) were performed in transient HEK293 cells co-transfected with Rluc-tagged MT<sub>1</sub> receptor and  $\beta$ -arrestin2 tagged with YFP. Data are expressed as percentage of MLT effect and represent 3 experiments performed in triplicates.
